# Supplementary material
Source: PubMed Central journal article supplement (PMC2804177)
Supplement: supp_M109.010512_jbc.M109.010512-1.pdf [file supp_M109.010512_jbc.M109.010512-1.pdf]

## Figure S1

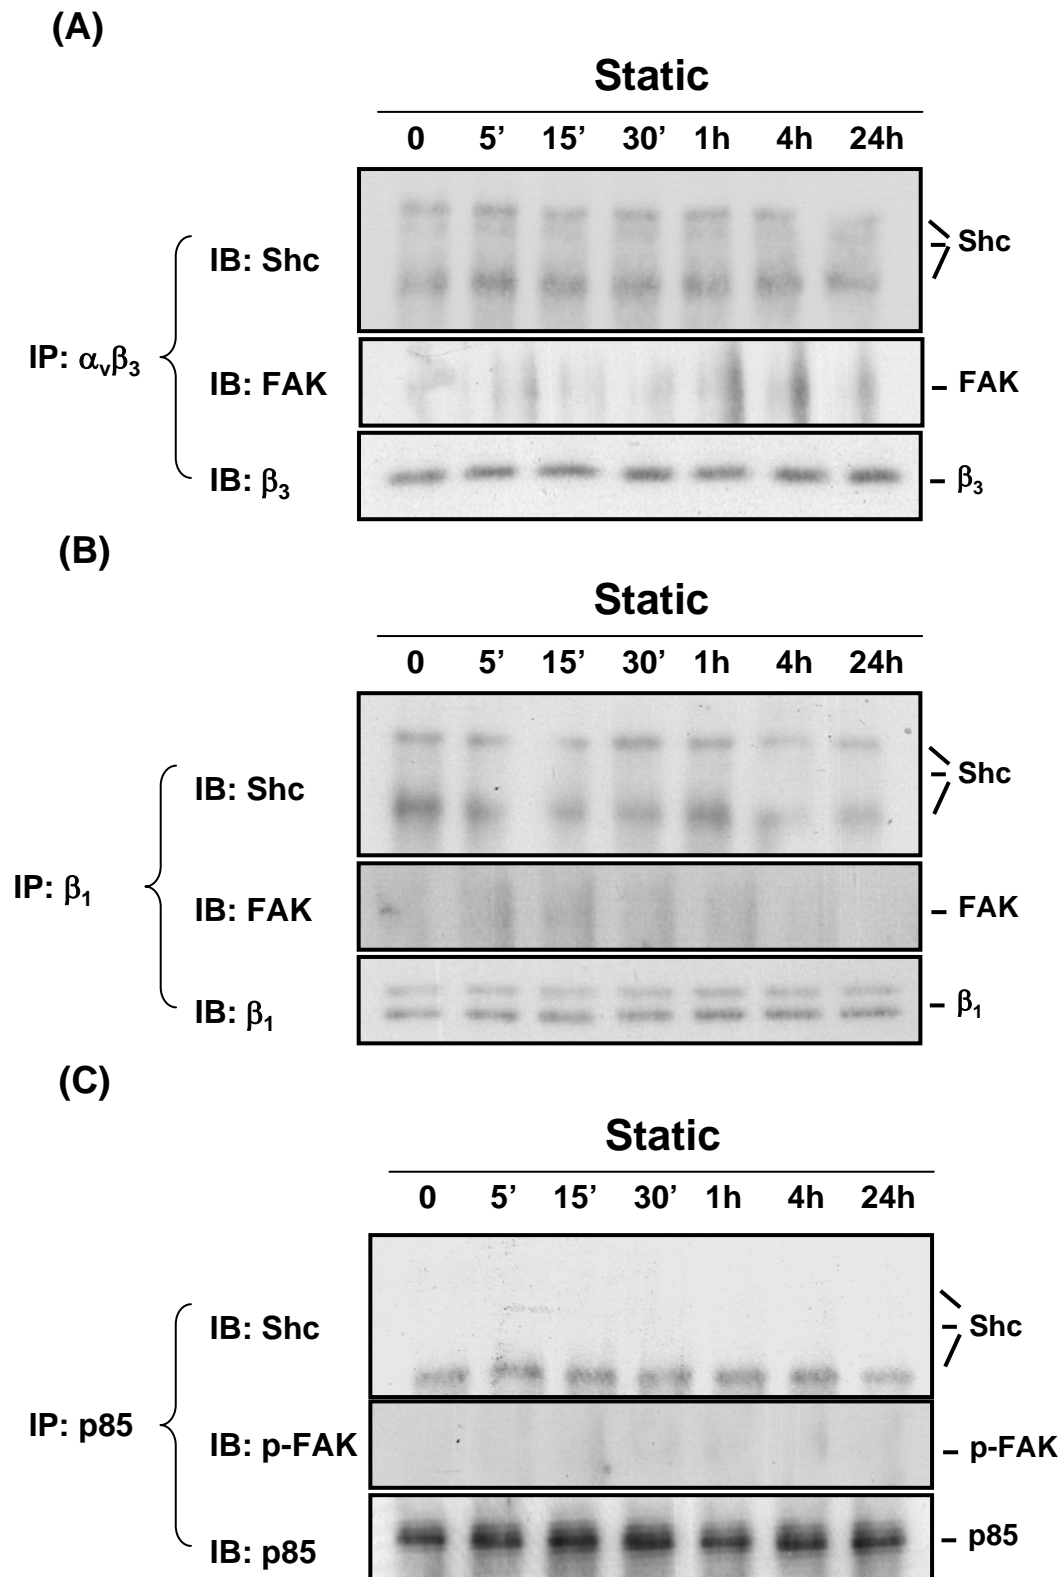

**Figure S1.** MG63 cells were kept under static condition for the indicated times, and the associations of  $\alpha_v\beta_3$  (A),  $\beta_1$  (B) integrins and p85 (C) with Shc and FAK in these cells were determined by using co-immunoprecipitation assays. Results are representative of three independent experiments with similar results.
